# Supplementary material for: Medication-Assisted Treatment for Alcohol-Dependent Adults With Serious Mental Illness and Criminal Justice Involvement: Effects on Treatment Utilization and Outcomes
Source: Atypon-hosted journal article supplement (doi:10.1176/appi.ajp.2018.17060688), 2018-07-01
Supplement: appi.ajp.2018.17060688.ds001.pdf [file appi.ajp.2018.17060688.ds001.pdf]

 


Psychiatry Online
